# Supplementary material for: Racial and ethnic differences in diagnosis, healthcare utilization and 1-year outcomes for patients with significant tricuspid regurgitation
Source: Atypon-hosted journal article supplement (doi:10.57264/cer-2025-0156), 2025-12-11
Supplement: supplementary data.docx [file supplementary%20data.docx]

Supplemental Table 1. Patient identification criteria for significant tricuspid regurgitation, by race/ethnicity.

|  | White  n (%) | Black  n (%) | Hispanic  n (%) |
| --- | --- | --- | --- |
| Severe physician note | 629 (1.1) | 105 (0.9) | 9 (0.3) |
| 3+ signs/symptoms | 57,774 (99.7) | 11,935 (99.9) | 2,719 (100.0) |
| Kidney disease | 55,447 (95.7) | 11,627 (97.3) | 2,613 (96.1) |
| Liver disease | 54,184 (93.5) | 11,052 (92.5) | 2,563 (94.2) |
| Edema | 52,704 (90.9) | 10,817 (90.5) | 2,419 (88.9) |
| Ascites | 9,111 (15.7) | 1,993 (16.7) | 513 (18.9) |
| Weight loss | 4,621 (8.0) | 1,051 (8.8) | 162 (6.0) |
| Extreme fatigue | 40 (0.1) | 3 (0.0) | 0 (0.0) |
| Right ventricular dysfunction | 33 (0.1) | 3 (0.0) | 1 (0.0) |

Supplemental Table 2. Comorbidity burden over time.

|  | Year -3  n (%) | Year -2  n (%) | Year -1  n (%) | Year +1  n (%) |
| --- | --- | --- | --- | --- |
| n | 52,781 | 62,360 | 72,630 | 72,021 |
| History of TR diagnosis | 29,982 (56.8) | 42,261 (67.8) | 63,155 (87) | 72,021 (100) |
| Atrial fibrillation | 18,976 (36.0) | 24,925 (40) | 34,090 (46.9) | 40,223 (55.8) |
| Other valve disease | 44,760 (84.8) | 52,724 (84.5) | 61,196 (84.3) | 60,681 (84.3) |
| Coronary artery disease | 28,820 (54.6) | 36,809 (59.0) | 47,944 (66) | 52,681 (73.1) |
| Peripheral artery disease | 24,903 (47.2) | 32,667 (52.4) | 43,354 (59.7) | 48,767 (67.7) |
| Congestive heart failure | 23,018 (43.6) | 30,899 (49.5) | 43,529 (59.9) | 50,995 (70.8) |
| Hypertension | 49,212 (93.2) | 58,971 (94.6) | 69,903 (96.2) | 70,402 (97.8) |
| Pulmonary hypertension | 8,549 (16.2) | 12,487 (20.0) | 20,550 (28.3) | 27,478 (38.2) |
| Liver disease | 19,549 (37) | 26,214 (42.0) | 31,236 (51.3) | 68,267 (94.8) |
| Kidney disease | 17,461 (33.1) | 23,446 (37.6) | 32,586 (44.9) | 45,272 (62.9) |
| CKD 5 or ESRD | 1,585 (3.0) | 2,365 (3.8) | 3,839 (5.3) | 6,370 (8.8) |
| Diabetes | 26,594 (50.4) | 32,961 (52.9) | 40,958 (56.4) | 43,598 (60.5) |
| Stroke or TIA | 13,550 (25.7) | 17,745 (28.5) | 23,809 (32.8) | 28,261 (39.2) |
| Dementia | 3,627 (6.9) | 5,775 (9.3) | 9,418 (13.0) | 13,492 (18.7) |
| Cancer | 2,663 (5.0) | 3,860 (6.2) | 6,783 (9.3) | 9,373 (13.0) |
| COPD | 19,290 (36.5) | 25,012 (40.1) | 33,057 (45.5) | 37,028 (51.4) |
| Pacemaker | 1,434 (2.7) | 1,975 (3.2) | 2,799 (3.9) | 3,778 (5.2) |
| Prior valve intervention (non-tricuspid) | 2,905 (5.5) | 3,345 (5.4) | 3,776 (5.2) | 3,736 (5.2) |
| Oxygen dependence | 3,222 (6.1) | 5,048 (8.1) | 8,728 (12) | 13,812 (19.2) |

TR, tricuspid regurgitation; CKD 5, chronic kidney disease stage 5; ESRD, end-stage renal disease; TIA, transient ischemic attack; COPD, chronic obstructive pulmonary disease

Supplemental Table 3. Unadjusted hazard ratios for one-year post-significant tricuspid regurgitation events, by race and ethnicity.

|  | Black | | | Hispanic | | |
| --- | --- | --- | --- | --- | --- | --- |
| One-year measures | HR1 | (95% CI) | p | HR1 | (95% CI) | p |
| Time to death (all-cause)2 | 0.84 | (0.80, 0.88) | <0.001 | 0.79 | (0.71, 0.86) | <0.001 |
| Time to heart failure hospitalization3 | 1.31 | (1.26, 1.36) | <0.001 | 1.11 | (1.03, 1.20) | 0.01 |
| Time to urgent/emergent admission3 | 1.25 | (1.21, 1.29) | <0.001 | 1.00 | (0.93, 1.07) | 0.96 |
| Time to emergency department visit3 | 1.28 | (1.24, 1.33) | <0.001 | 1.23 | (1.15, 1.31) | <0.001 |
| Time to outpatient cardiac specialist visit3 | 0.83 | (0.80, 0.85) | <0.001 | 0.92 | (0.87, 0.97) | <0.01 |

1Hazard ratios are adjusted for all baseline characteristics in Table 1, with White patients as the reference group. 2Calculated using Cox proportional hazards models. 3Calculated using Fine-Gray sub-distribution hazard models.

HR, hazard ratio; CI, confidence interval

Supplemental Table 4. Hazard ratios for all explanatory variables for all-cause mortality.

| Explanatory variables | | Overall | | | White | | | Black | | | Hispanic | | |
| --- | --- | --- | --- | --- | --- | --- | --- | --- | --- | --- | --- | --- | --- |
| HR | (95% CI) | p | HR | (95% CI) | p | HR | (95% CI) | p | HR | (95% CI) | p |
| Age (5 year increase) | | 1.23 | (1.21, 1.24) | **<0.001** | 1.24 | (1.22, 1.26) | **<0.001** | 1.18 | (1.14, 1.21) | **<0.001** | 1.19 | (1.12, 1.26) | **<0.001** |
| Male sex | | 1.24 | (1.20, 1.28) | **<0.001** | 1.25 | (1.20, 1.30) | **<0.001** | 1.18 | (1.08, 1.30) | **<0.001** | 1.22 | (1.00, 1.48) | **<0.05** |
| Census region | Midwest | **-** |  |  | **-** |  |  | **-** |  |  | **-** |  |  |
| South | 1.10 | (1.06, 1.15) | **<0.001** | 1.09 | (1.04, 1.14) | **<0.001** | 1.23 | (1.11, 1.36) | **<0.001** | 0.85 | (0.67, 1.08) | 0.20 |
| Northeast | 0.81 | (0.77, 0.85) | **<0.001** | 0.83 | (0.78, 0.87) | **<0.001** | 0.76 | (0.67, 0.86) | **<0.001** | 0.65 | (0.49, 0.85) | **<0.01** |
| West | 0.92 | (0.85, 0.99) | **<0.05** | 0.90 | (0.83, 0.98) | **<0.05** | 0.96 | (0.70, 1.31) | 0.80 | 0.88 | (0.64, 1.21) | 0.40 |
| Payor | Commercial | **-** |  |  | **-** |  |  | **-** |  |  | **-** |  |  |
| Medicare | 0.96 | (0.91, 1.01) | 0.10 | 0.92 | (0.87, 0.97) | **<0.01** | 1.13 | (0.99, 1.30) | 0.07 | 1.14 | (0.85, 1.54) | 0.40 |
| Medicaid | 0.86 | (0.78, 0.95) | **<0.01** | 0.93 | (0.82, 1.05) | 0.20 | 0.76 | (0.63, 0.93) | **0.01** | 0.86 | (0.57, 1.30) | 0.50 |
| Elixhauser score (1 point increase) | | 1.12 | (1.11, 1.12) | **<0.001** | 1.12 | (1.11, 1.12) | **<0.001** | 1.12 | (1.10, 1.14) | **<0.001** | 1.14 | (1.10, 1.18) | **<0.001** |
| Atrial fibrillation | | 1.15 | (1.10, 1.19) | **<0.001** | 1.14 | (1.10, 1.19) | **<0.001** | 1.15 | (1.04, 1.27) | **<0.01** | 1.15 | (0.93, 1.42) | 0.20 |
| Other valve disease | | 0.94 | (0.90, 0.99) | **<0.05** | 0.93 | (0.88, 0.99) | **<0.05** | 0.98 | (0.87, 1.11) | 0.70 | 1.05 | (0.81, 1.36) | 0.70 |
| Coronary artery disease | | 0.90 | (0.86, 0.93) | **<0.001** | 0.89 | (0.85, 0.94) | **<0.001** | 0.89 | (0.80, 1.00) | **<0.05** | 0.97 | (0.75, 1.26) | 0.80 |
| Peripheral artery disease | | 0.98 | (0.94, 1.02) | 0.30 | 1.00 | (0.96, 1.05) | >0.9 | 0.87 | (0.78, 0.96) | **<0.05** | 0.91 | (0.72, 1.15) | 0.40 |
| Congestive heart failure | | 1.09 | (1.04, 1.14) | **<0.001** | 1.10 | (1.04, 1.15) | **<0.001** | 1.07 | (0.94, 1.22) | 0.30 | 0.98 | (0.74, 1.29) | 0.90 |
| Hypertension | | 0.63 | (0.56, 0.70) | **<0.001** | 0.61 | (0.54, 0.69) | **<0.001** | 0.96 | (0.56, 1.63) | 0.90 | 0.48 | (0.24, 0.95) | **<0.05** |
| Pulmonary hypertension | | 1.07 | (1.04, 1.11) | **<0.001** | 1.08 | (1.04, 1.12) | **<0.001** | 1.04 | (0.95, 1.15) | 0.40 | 0.98 | (0.79, 1.21) | 0.80 |
| Liver disease | | 0.93 | (0.87, 0.99) | **<0.05** | 0.89 | (0.83, 0.95) | **<0.001** | 1.14 | (0.96, 1.35) | 0.13 | 1.13 | (0.78, 1.65) | 0.50 |
| Kidney disease | | 1.29 | (1.22, 1.37) | **<0.001** | 1.34 | (1.25, 1.43) | **<0.001** | 1.17 | (1.04, 1.32) | **0.01** | 1.31 | (1.02, 1.69) | **<0.05** |
| CKD 5 or ESRD | | 0.99 | (0.95, 1.03) | 0.60 | 0.98 | (0.94, 1.03) | 0.50 | 0.98 | (0.88, 1.10) | 0.80 | 1.06 | (0.82, 1.37) | 0.70 |
| Diabetes | | 0.81 | (0.78, 0.84) | **<0.001** | 0.82 | (0.79, 0.85) | **<0.001** | 0.71 | (0.64, 0.79) | **<0.001** | 0.76 | (0.58, 0.98) | **<0.05** |
| Stroke or TIA | | 1.04 | (1.01, 1.08) | **<0.05** | 1.04 | (1.00, 1.08) | 0.07 | 1.07 | (0.98, 1.18) | 0.13 | 1.05 | (0.86, 1.28) | 0.70 |
| Dementia | | 1.34 | (1.28, 1.39) | **<0.001** | 1.33 | (1.27, 1.39) | **<0.001** | 1.43 | (1.28, 1.59) | **<0.001** | 1.20 | (0.95, 1.51) | 0.13 |
| Cancer | | 2.11 | (2.02, 2.20) | **<0.001** | 2.10 | (2.01, 2.21) | **<0.001** | 2.12 | (1.89, 2.37) | **<0.001** | 2.14 | (1.64, 2.79) | **<0.001** |
| COPD | | 1.02 | (0.98, 1.06) | 0.30 | 1.04 | (1.00, 1.08) | 0.06 | 0.96 | (0.87, 1.05) | 0.40 | 0.77 | (0.62, 0.95) | **<0.05** |
| Prior valve intervention | | 0.91 | (0.84, 0.98) | **<0.05** | 0.91 | (0.85, 0.99) | **<0.05** | 0.79 | (0.59, 1.06) | 0.11 | 0.97 | (0.62, 1.53) | 0.90 |
| Pacemaker | | 0.91 | (0.85, 0.98) | **<0.05** | 0.92 | (0.85, 0.99) | **<0.05** | 0.85 | (0.69, 1.06) | 0.20 | 0.95 | (0.62, 1.46) | 0.80 |
| Oxygen dependence | | 1.36 | (1.31, 1.42) | **<0.001** | 1.35 | (1.29, 1.41) | **<0.001** | 1.40 | (1.25, 1.57) | **<0.001** | 1.70 | (1.33, 2.16) | **<0.001** |
| Inpatient at time of sTR | | 2.39 | (2.29, 2.48) | **<0.001** | 2.36 | (2.26, 2.47) | **<0.001** | 2.54 | (2.27, 2.85) | **<0.001** | 2.54 | (2.02, 3.19) | **<0.001** |
| OP cardiac specialist visits in the year prior to sTR (1 visit increase) | | 0.98 | (0.98, 0.99) | **<0.001** | 0.98 | (0.98, 0.99) | **<0.001** | 0.99 | (0.98, 1.00) | **<0.05** | 0.97 | (0.95, 1.00) | **<0.05** |

HR, hazard ratio; CI, confidence interval; CKD 5, chronic kidney disease stage 5; ESRD, end-stage renal disease; TIA, transient ischemic attack; COPD, chronic obstructive pulmonary disease; sTR, significant tricupsid regurgitation; OP, outpatient

Supplemental Table 5. Hazard ratios for all explanatory variables for heart failure hospitalization.

| Explanatory variables | | Overall | | | White | | | Black | | | Hispanic | | |
| --- | --- | --- | --- | --- | --- | --- | --- | --- | --- | --- | --- | --- | --- |
| HR | (95% CI) | p | HR | (95% CI) | p | HR | (95% CI) | p | HR | (95% CI) | p |
| Age (5 year increase) | | 1.02 | (1.01, 1.03) | **<0.001** | 1.03 | (1.02, 1.04) | **<0.001** | 1.00 | (0.98, 1.03) | 0.66 | 1.00 | (0.95, 1.05) | 0.99 |
| Male sex | | 1.08 | (1.05, 1.11) | **<0.001** | 1.05 | (1.01, 1.09) | **<0.01** | 1.17 | (1.09, 1.26) | **<0.001** | 1.22 | (1.04, 1.42) | **<0.05** |
| Census region | Midwest | **-** | | | **-** | | | **-** | | | **-** | | |
| South | 1.00 | (0.96, 1.03) | 0.84 | 0.99 | (0.95, 1.04) | 0.72 | 1.02 | (0.94, 1.1) | 0.67 | 0.95 | (0.78, 1.15) | 0.58 |
| Northeast | 0.94 | (0.90, 0.98) | **<0.05** | 0.95 | (0.91, 1) | 0.05 | 0.96 | (0.88, 1.05) | 0.42 | 0.77 | (0.62, 0.95) | **<0.05** |
| West | 0.98 | (0.91, 1.05) | 0.51 | 0.95 | (0.89, 1.03) | 0.22 | 1.22 | (0.99, 1.5) | 0.06 | 0.86 | (0.65, 1.13) | 0.28 |
| Payor | Commercial | **-** | | | **-** | | | **-** | | | **-** | | |
| Medicare | 1.01 | (0.96, 1.05) | 0.81 | 1.01 | (0.96, 1.06) | 0.72 | 0.99 | (0.89, 1.1) | 0.83 | 0.92 | (0.73, 1.17) | 0.51 |
| Medicaid | 1.40 | (1.31, 1.49) | **<0.001** | 1.42 | (1.30, 1.55) | **<0.001** | 1.31 | (1.17, 1.48) | **<0.001** | 1.24 | (0.93, 1.64) | 0.14 |
| Elixhauser score (1 point increase) | | 1.07 | (1.06, 1.07) | **<0.001** | 1.06 | (1.06, 1.07) | **<0.001** | 1.07 | (1.06, 1.09) | **<0.001** | 1.09 | (1.06, 1.12) | **<0.001** |
| Atrial fibrillation | | 1.27 | (1.22, 1.31) | **<0.001** | 1.26 | (1.21, 1.32) | **<0.001** | 1.24 | (1.15, 1.33) | **<0.001** | 1.50 | (1.26, 1.79) | **<0.001** |
| Other valve disease | | 1.25 | (1.19, 1.32) | **<0.001** | 1.23 | (1.15, 1.31) | **<0.001** | 1.35 | (1.22, 1.51) | **<0.001** | 1.01 | (0.81, 1.27) | 0.93 |
| Coronary artery disease | | 1.18 | (1.14, 1.23) | **<0.001** | 1.16 | (1.10, 1.22) | **<0.001** | 1.29 | (1.17, 1.41) | **<0.001** | 1.26 | (0.99, 1.59) | 0.06 |
| Peripheral artery disease | | 1.05 | (1.01, 1.09) | **<0.05** | 1.08 | (1.03, 1.12) | **<0.001** | 0.95 | (0.87, 1.03) | 0.18 | 1.10 | (0.89, 1.34) | 0.38 |
| Congestive heart failure | | 3.59 | (3.39, 3.8) | **<0.001** | 3.50 | (3.29, 3.73) | **<0.001** | 4.00 | (3.46, 4.61) | **<0.001** | 4.05 | (2.94, 5.59) | **<0.001** |
| Hypertension | | 1.17 | (1.00, 1.37) | 0.05 | 1.18 | (0.99, 1.4) | 0.06 | 1.28 | (0.76, 2.16) | 0.36 | 0.81 | (0.38, 1.74) | 0.60 |
| Pulmonary hypertension | | 1.24 | (1.20, 1.28) | **<0.001** | 1.24 | (1.19, 1.29) | **<0.001** | 1.23 | (1.14, 1.33) | **<0.001** | 1.21 | (1.02, 1.43) | **<0.05** |
| Liver disease | | 0.77 | (0.73, 0.81) | **<0.001** | 0.79 | (0.74, 0.84) | **<0.001** | 0.72 | (0.65, 0.81) | **<0.001** | 0.58 | (0.46, 0.74) | **<0.001** |
| Kidney disease | | 1.20 | (1.15, 1.24) | **<0.001** | 1.20 | (1.15, 1.25) | **<0.001** | 1.16 | (1.06, 1.27) | **<0.01** | 1.25 | (1.02, 1.53) | **<0.05** |
| CKD 5 or ESRD | | 1.09 | (1.04, 1.15) | **<0.001** | 1.09 | (1.02, 1.17) | **<0.01** | 1.08 | (0.98, 1.18) | 0.13 | 1.14 | (0.92, 1.41) | 0.22 |
| Diabetes | | 1.01 | (0.97, 1.04) | 0.66 | 1.04 | (1.00, 1.08) | **<0.05** | 0.88 | (0.81, 0.96) | **<0.01** | 0.88 | (0.70, 1.09) | 0.24 |
| Stroke or TIA | | 0.95 | (0.92, 0.98) | **<0.01** | 0.96 | (0.92, 0.99) | **<0.05** | 0.92 | (0.86, 0.99) | **<0.05** | 0.98 | (0.84, 1.15) | 0.81 |
| Dementia | | 0.87 | (0.84, 0.91) | **<0.001** | 0.87 | (0.83, 0.92) | **<0.001** | 0.92 | (0.83, 1.01) | 0.10 | 0.74 | (0.59, 0.93) | **<0.05** |
| Cancer | | 0.79 | (0.75, 0.83) | **<0.001** | 0.80 | (0.75, 0.85) | **<0.001** | 0.74 | (0.65, 0.84) | **<0.001** | 0.83 | (0.61, 1.12) | 0.22 |
| COPD | | 1.12 | (1.08, 1.15) | **<0.001** | 1.14 | (1.10, 1.19) | **<0.001** | 1.04 | (0.97, 1.12) | 0.29 | 1.00 | (0.85, 1.18) | 0.97 |
| Pacemaker | | 0.98 | (0.92, 1.04) | 0.52 | 0.98 | (0.92, 1.05) | 0.64 | 0.97 | (0.82, 1.14) | 0.68 | 0.99 | (0.70, 1.39) | 0.95 |
| Prior valve intervention | | 0.88 | (0.82, 0.93) | **<0.001** | 0.89 | (0.83, 0.95) | **<0.001** | 0.83 | (0.69, 1.01) | 0.07 | 0.73 | (0.51, 1.05) | 0.09 |
| Oxygen dependence | | 1.12 | (1.08, 1.17) | **<0.001** | 1.12 | (1.07, 1.17) | **<0.001** | 1.11 | (1.02, 1.22) | **<0.05** | 1.24 | (1.01, 1.52) | **<0.05** |
| Inpatient at time of sTR | | 1.16 | (1.12, 1.2) | **<0.001** | 1.15 | (1.11, 1.19) | **<0.001** | 1.20 | (1.11, 1.29) | **<0.001** | 1.09 | (0.92, 1.28) | 0.33 |
| OP cardiac specialist visits in the year prior to sTR (1 visit increase) | | 1.02 | (1.02, 1.02) | **<0.001** | 1.02 | (1.02, 1.02) | **<0.001** | 1.02 | (1.01, 1.03) | **<0.001** | 1.00 | (0.99, 1.02) | 0.70 |

HR, hazard ratio; CI, confidence interval; CKD 5, chronic kidney disease stage 5; ESRD, end-stage renal disease; TIA, transient ischemic attack; COPD, chronic obstructive pulmonary disease; sTR, significant tricupsid regurgitation; OP, outpatient
